# Supplementary material for: NFATc3 controls tumour growth by regulating proliferation and migration of human astroglioma cells
Source: PubMed Central journal article supplement (PMC6597574; doi:10.1038/s41598-019-45731-w), 2019-06-27
Supplement: 41598_2019_45731_MOESM1_ESM.pdf [file 41598_2019_45731_MOESM1_ESM.pdf]

# NFATc3 controls tumour growth by regulating proliferation and migration of human astroglioma cells

Katia Urso<sup>4#</sup>, Andrés Fernández<sup>1#\*</sup>, Patricia Velasco<sup>1</sup>, Javier Cotrina<sup>1</sup>, Belén de Andrés<sup>2</sup>, Pilar Sánchez-Gómez<sup>1</sup>, Aurelio Hernández-Laín<sup>5</sup>, Sonsoles Hortelano<sup>3</sup>, Juan Miguel Redondo<sup>4</sup> and Eva Cano<sup>1\*</sup>

## Supplemental Figure S1

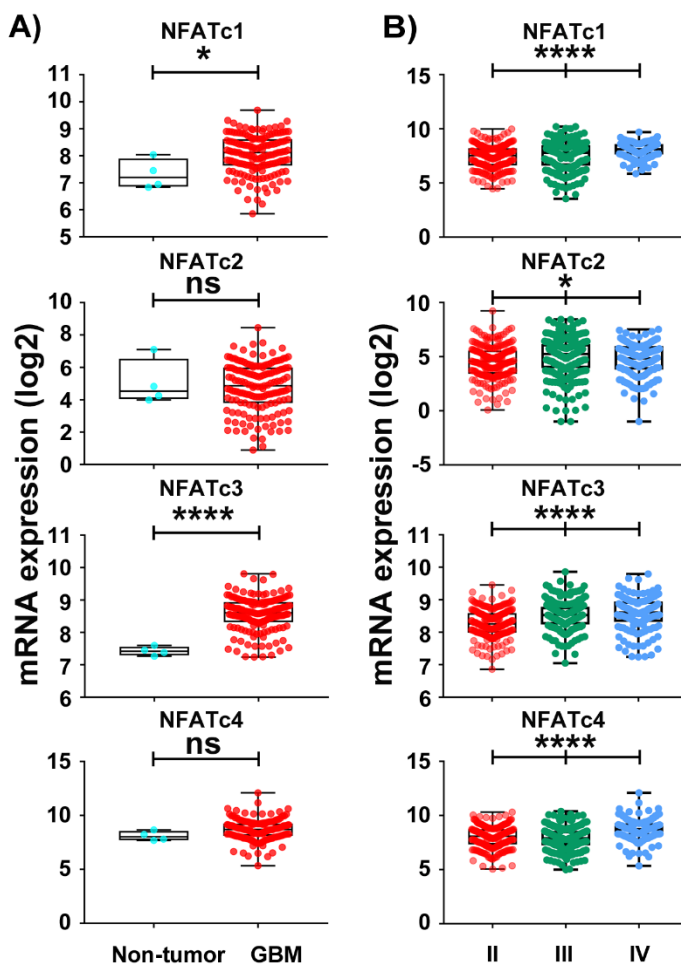

**Supplemental Figure S1: Analysis of NFATc family member's expression using TCGA databases.** Interrogating RNAseq in TCGA studies (<http://cancergenome.nih.gov/>) using Gliovis tools (<http://gliovis.bioinfo.cnio.es/>). Data were downloaded and analysed using GraphPad software. Significance results are indicated. A) Comparison of normal and tumour samples using TCGA\_GBM study. 160 cases, 4 non-tumour and 156 GBM. . c1: \*P < 0.05, c2: <sup>ns</sup>P > 0.05, c3: \*\*\*\*P < 0.0001, c4: <sup>ns</sup>P > 0.05 (t-test). B) Expression and tumour progression across glioblastoma tumour grade II, III and IV using TCGA\_LGG data. 620 cases. c1: \*\*\*\*P < 0.0001, c2 \*P < 0.05, c3: \*\*\*\*P < 0.0001, c4: \*\*\*\*P < 0.0001 (ANOVA).

## Supplemental Figure S2

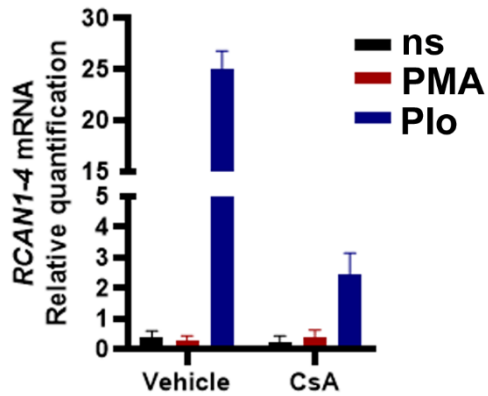

**Supplemental Figure S2. PMA alone is not sufficient to promote NFAT-dependent *RCAN1-4* expression.** U251 cells were pre-treated without or with CsA (200 ng/mL) and then stimulated for 4 hours with PMA (20 ng/ml) or in combination with calcium ionophore, Io (1  $\mu$ M), Pio as indicated, RCAN1-4 mRNA was amplified from total RNA by TaqMan RT-PCR. RCAN1-4 mRNA was quantified in arbitrary units normalized to the expression of human TBP. Levels are presented as the fold expression above non stimulated, ns, cells. Values are means  $\pm$  SD of RT-PCR determinations for each condition.
